# Supplementary material
Source: PubMed Central journal article supplement (PMC8925889)
Supplement: jcm.02245-21-s0001.pdf [file jcm.02245-21-s0001.pdf]

|        |                                                                       |     |
|--------|-----------------------------------------------------------------------|-----|
| KPC-3  | MSLYRRLVLLSCLSWPLAGFSATALTNLVAEPFAKLEQDFGGSIGVYAMDTGSGATVSYR          | 60  |
| KPC-46 | MSLYRRLVLLSCLSWPLAGFSATALTNLVAEPFAKLEQDFGGSIGVYAMDTGSGATVSYR          | 60  |
| KPC-92 | MSLYRRLVLLSCLSWPLAGFSATALTNLVAEPFAKLEQDFGGSIGVYAMDTGSGATVSYR          | 60  |
| KPC-66 | MSLYRRLVLLSCLSWPLAGFSATALTNLVAEPFAKLEQDFGGSIGVYAMDTGSGATVSYR<br>***** | 60  |
|        |                                                                       |     |
| KPC-3  | AERFPLCSSFKGFLLAAAVLARSQQQAGLLDTPIRYGKNALVPWSPISEKYLTGTMVAE           | 120 |
| KPC-46 | AERFPLCSSFKGFLLAAAVLARSQQQAGLLDTPIRYGKNALVPWSPISEKYLTGTMVAE           | 120 |
| KPC-92 | AERFPLCSSFKGFLLAAAVLARSQQQAGLLDTPIRYGKNALVPWSPISEKYLTGTMVAE           | 120 |
| KPC-66 | AERFPLCSSFKGFLLAAAVLARSQQQAGLLDTPIRYGKNALVPWSPISEKYLTGTMVAE<br>*****  | 120 |
|        |                                                                       |     |
| KPC-3  | LSAAAVQYSDNAAANLLLKELGGPAGLTAFMRSIGDITFRLD                            | 180 |
| KPC-46 | LSAAAVQYSDNAAANLLLKELGGPAGLTAFMRSIGDITFRLD                            | 180 |
| KPC-92 | LSAAAVQYSDNAAANLLLKELGGPAGLTAFMRSIGDITFRLD                            | 178 |
| KPC-66 | LSAAAVQYSDNAAANLLLKELGGPAGLTAFMRSIGDITFRLD<br>*****                   | 178 |
|        |                                                                       |     |
| KPC-3  | SPRAVTESLQKLTLSALAAPQRQQFVDWLKGNITGNHRIRAAVPADWAVGDKTGTGCVY           | 240 |
| KPC-46 | SPRAVTESLQKLTLSALAAPQRQQFVDWLKGNITGNHRIRAAVPADWAVGDKTGTGCVY           | 240 |
| KPC-92 | SPRAVTESLQKLTLSALAAPQRQQFVDWLKGNITGNHRIRAAVPADWAVGDKTGTGCVY           | 238 |
| KPC-66 | SPRAVTESLQKLTLSALAAPQRQQFVDWLKGNITGNHRIRAAVPADWAVGDKTGTGCVY<br>*****  | 238 |
|        |                                                                       |     |
| KPC-3  | GTANDYAVVWPTGRAPIVLAVYTRAPNKDDKYSEAVIAAAARLALEGLGVNGQ                 | 293 |
| KPC-46 | GTANDYAVVWPTGRAPIVLAVYTRAPNKDDKYSEAVIAAAARLALEGLGVNGQ                 | 293 |
| KPC-92 | GTANDYAVVWPTGRAPIVLAVYTRAPNKDDKYSEAVIAAAARLALEGLGVNGQ                 | 291 |
| KPC-66 | GTANDYAVVWPTGRAPIVLAVYTRAPNKDDKYSEAVIAAAARLALEGLGVNGQ<br>*****        | 291 |

**Figure S1.** Alignment of the amino acid sequences of KPC-3 and novel KPC-46, KPC-66 and KPC-92 enzymes. Red box indicates the  $\Omega$ -loop region (Arg164 to Asp179). The gray shading shows the mutated positions in KPC-46, KPC-66 and KPC-92 variants.
